# Supplementary material for: Neutrophil-to-Lymphocyte Ratio and Early Variation of NLR to Predict In-Hospital Mortality and Severity in ED Patients with SARS-CoV-2 Infection
Source: MDPI journal article supplement (doi:10.3390/jcm10122563), 2021-06-09
Supplement: s1 [file s1]

## Tables and Figures

**Figure 1:** Flowchart of the study

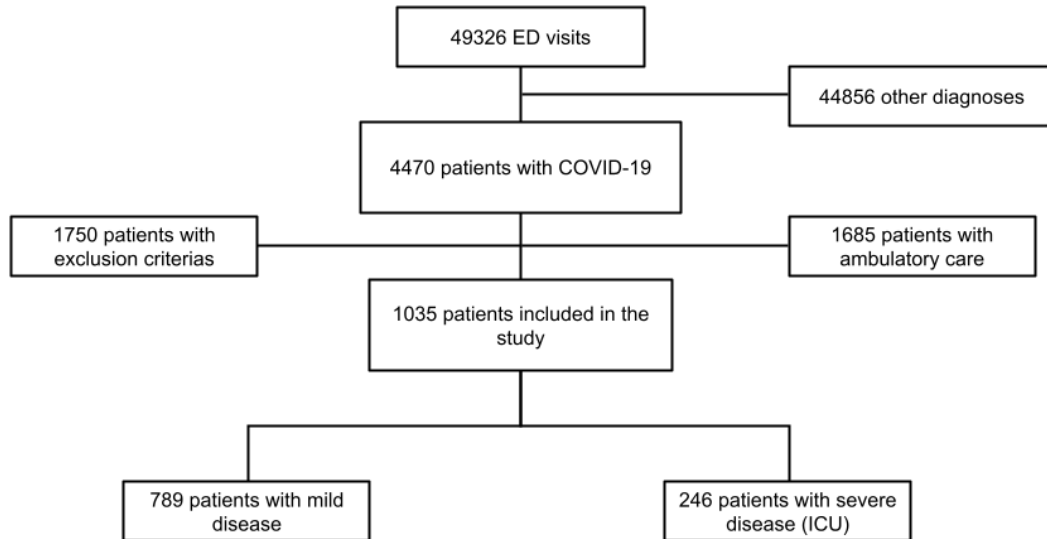

Abbreviations: ED: Emergency Department, ICU: intensive care unit

**Table 1:** Demographic, baseline and laboratory characteristics of patients with COVID-19

|                                    | All patients<br>N=1035 | Moderate<br>N=789  | Severe<br>N=246   | p       |
|------------------------------------|------------------------|--------------------|-------------------|---------|
| <b>General characteristics</b>     |                        |                    |                   |         |
| Age (years)                        | 69 [58-79]             | 70 [58-81]         | 66 [57.3-72]      | <0.001* |
| Gender male                        | 609 (58.8)             | 433 (54.9)         | 176 (71.5)        | <0.001* |
| Obesity (BMI $\geq 30$ )           | 281 (36.9)             | 193 (35.0)         | 88 (41.9)         | 0.076   |
| <b>Chronic medical illness</b>     |                        |                    |                   |         |
| Hypertension                       | 587 (56.7)             | 453 (57.4)         | 134 (54.5)        | 0.416   |
| Diabetes mellitus                  | 275 (26.7)             | 202 (25.6)         | 73 (26.6)         | 0.207   |
| CKD                                | 237 (23.2)             | 199 (25.5)         | 38 (15.8)         | 0.002*  |
| Cardiovascular illness             | 357 (34.5)             | 291 (36.9)         | 66 (26.8)         | 0.004*  |
| Total Autonomy                     | 796 (77.2)             | 569 (72.4)         | 227 (92.7)        | <0.001* |
| Respiratory illness                | 203 (19.6)             | 151 (19.1)         | 52 (21.1)         | 0.490   |
| <b>Laboratory findings</b>         |                        |                    |                   |         |
| CRP (mg/L)                         | 81 [39-142.3]          | 68 [33-128]        | 124 [76-192]      | <0.001* |
| Lymphocyte ( $\times 10^9/L$ )     | 870 [630-1200]         | 900 [640-1220]     | 780 [590-1122]    | 0.003*  |
| Lymphocyte H24 ( $\times 10^9/L$ ) | 940 [670-1300]         | 1010 [710-1360]    | 800 [570-1110]    | <0.001* |
| Neutrophil ( $\times 10^9/L$ )     | 4930 [3430- 6932]      | 4730 [3370-6620]   | 5510 [3760-8160]  | <0.001* |
| Neutrophil H24 ( $\times 10^9/L$ ) | 4680 [3300-6765]       | 4395 [3005-6175]   | 6010 [4130-8210]  | <0.001* |
| Admission NLR                      | 5.4 [3.5-9.3]          | 5.2 [3.2-8.7]      | 6.6 [4.1-11.1]    | <0.001* |
| H-24 NLR                           | 5 [3.1-8.2]            | 4.4 [2.7-7]        | 7.4 [4.7-12.5]    | <0.001* |
| $\Delta$ NLR >0 (%)                | 334 (41.3)             | 211 (35.3)         | 123 (58.0)        | <0.001* |
| $\Delta$ NLR                       | -0.64 [-2.88-1.29]     | -0.88 [-3.09-0.79] | 0.48 [-1.78-3.72] | <0.001* |
| <b>Outcome</b>                     |                        |                    |                   |         |
| Hospital stay (days)               | 10 [7-17.3]            | 8 [6-12]           | 24 [17-38]        | <0.001* |
| Intra-hospital mortality           | 139 (13.6)             | 82 (10.4)          | 57 (24.1)         | <0.001* |

Data are all expressed in median [Q1–Q3] n (%) where n is the total number of patients with available data. \*  $p < 0.05$ .

**Abbreviations:** BMI = body mass index, CKD= Chronic kidney disease, ED= Emergency Department, O<sub>2</sub>= oxygen, °C=Celsius degree, CRP=C reactive protein, NLR= neutrophil to lymphocyte ratio,  $\Delta$ NLR = difference between NLR (NLR H-24 - NLR at admission).

**Table 2:** Biochemical factors associated with severe COVID-19 (admission to the ICU)

|                       |                |               |                 | Multivariate analysis** |         |
|-----------------------|----------------|---------------|-----------------|-------------------------|---------|
|                       | All            | Moderate      | Severe          | OR (95%CI)              | p-value |
| CRP                   | 81 [39-142.3]  | 68 [33-128]   | 124 [76- 92]    | 1.007 [1.005-1.010]     | <0.001* |
| Admission lymphocytes | 870 [630-1200] | 900[640-1220] | 780[590-1122.5] | 1.000 [1.000-1.000]     | 0.841   |
| Admission NLR         | 5.4 [3.5-9.3]  | 5.2 [3.2-8.7] | 6.6 [4.1-11.1]  | 0.971 [0.940-1.004]     | 0.082   |
| H-24 NLR              | 5 [3.1-8.2]    | 4.4 [2.7-7.0] | 7.4 [4.7-12.5]  | 1.117 [1.060-1.176]     | <0.001* |
| $\Delta$ NLR >0 (%)   | 334 (41.3)     | 211 (35.3)    | 123 (58.0)      | 1.877 [1.160-3.036]     | 0.010 * |

Data are all expressed in median [Q1–Q3] or n (%) where n is the total number of patients with available data. \*  $p < 0.05$ , \*\* model adjusted on gender, Body mass index, C reactive protein, Creatinine, Admission NLR, NLR H24 and  $\Delta$ NLR.

Abbreviations: OR= odds ratio, BMI = body mass index, CRP=C reactive protein, NLR= neutrophil to lymphocyte ratio,  $\Delta$ NLR = difference between NLR (NLR H-24 - NLR at admission).

**Figure 2:** Receiver operating characteristics (ROC) curve for NLR as a predictive factor of severe COVID-19

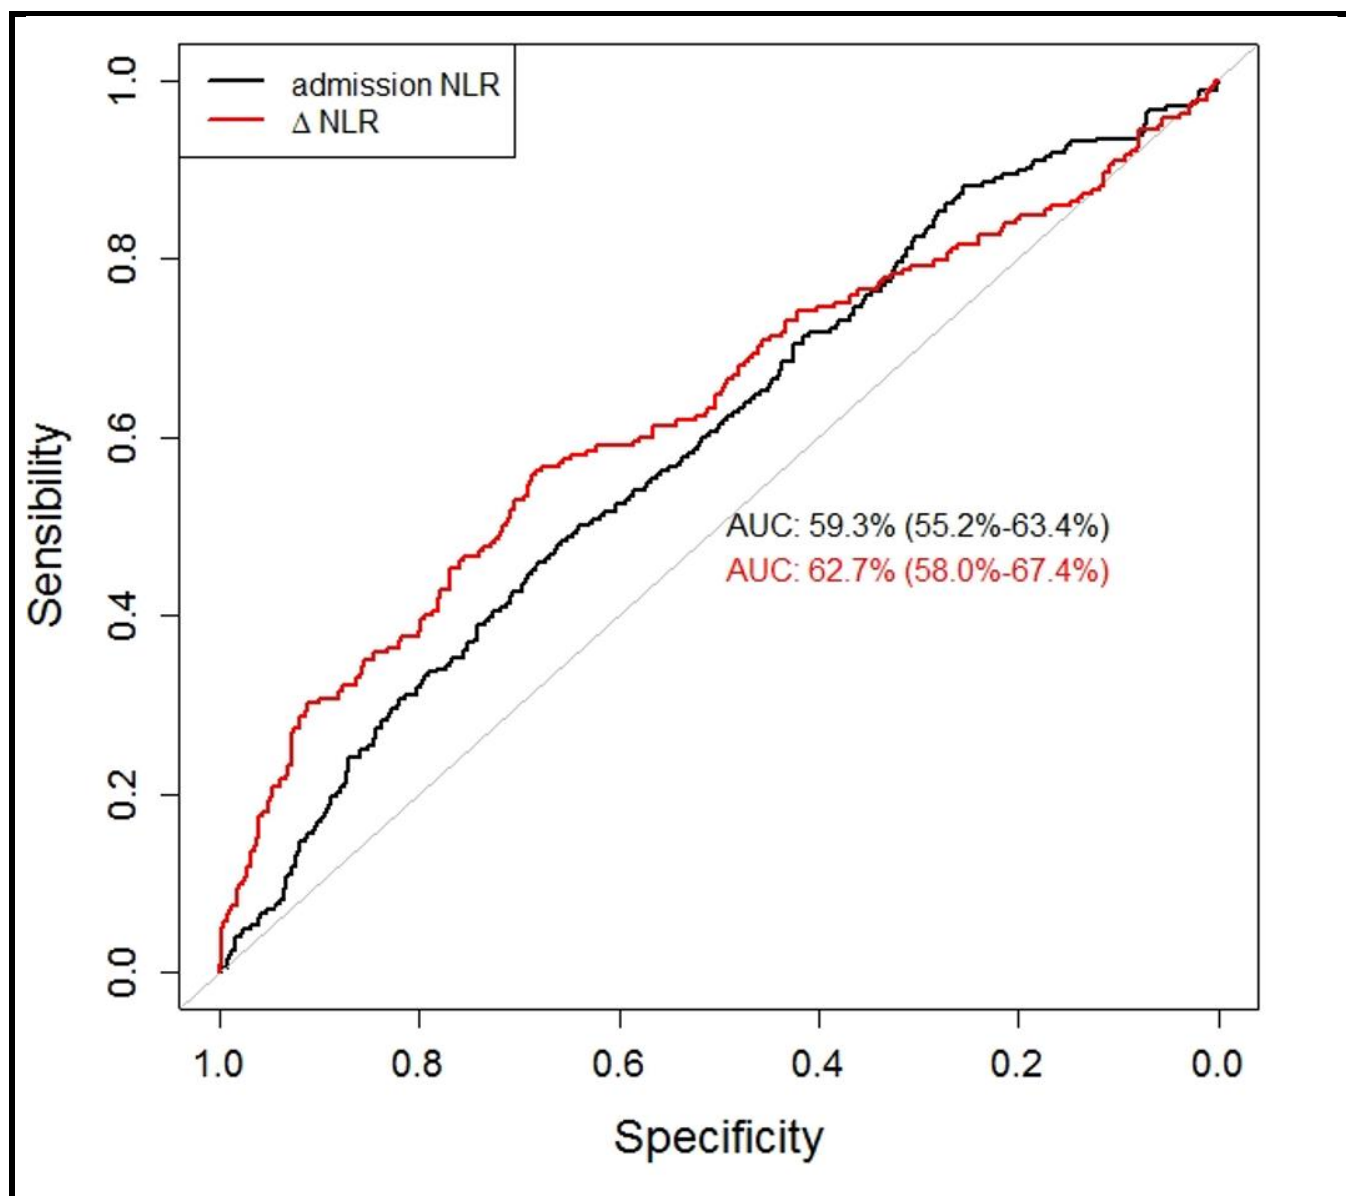

| To predict critical illness | Area under curve    | Cut-off | Sensibility      | Specificity      | Multivariate analyse with cut-off |        |
|-----------------------------|---------------------|---------|------------------|------------------|-----------------------------------|--------|
|                             |                     |         |                  |                  | OR (95%CI)                        | p      |
| Admission NLR               | 0.593 [0.552-0.634] | 6.883   | 48.3 [41,9-54,8] | 65.7 [62.2-69.0] | 0.975 [0.947-1.005]               | 0.097  |
| ΔNLR                        | 0.627 [0.580-0.674] | 0.222   | 56.1 [49.2-62.9] | 68,3 [64.4-72.1] | 2.187 [1.348-3.547]               | 0.002* |

Data are all expressed in median [Q1-Q3], \*:  $p < 0.005$ , \*\*: model adjusted on Gender, Body mass index, C reactive protein, Creatinine, Admission NLR, NLR H24 and  $\Delta$  NLR.

Abbreviations: OR= odds ratio, NLR: neutrophil lymphocyte ratio,  $\Delta$ NLR = difference between NLR (NLR H-24 - NLR at admission).

**Table 3:** Biochemical and predictive factors of mortality in COVID-19 patients

|                       |                |               | Univariate analysis |         | Multivariate analysis** |         |
|-----------------------|----------------|---------------|---------------------|---------|-------------------------|---------|
|                       | Survivors      | Non-survivors | OR (95% CI)         | p-value | OR (95% CI)             | p-value |
| CRP                   | 100.0 [56-158] | 78.5 [37-139] | 1.003 [1.001-1.005] | 0.006*  | 1.002 [0.999-1.005]     | 0.276   |
| Admission lymphocytes | 720 [500-1000] | 890[650-1120] | 0.999 [0.999-1]     | 0.004   | 1.000 [0.999-1.001]     | 0.967   |
| Admission NLR         | 7.6 [4.3-11.8] | 5.2 [3.3-8.8] | 1.023 [1.006-1.042] | 0.010*  | 1.020 [0.987-1.055]     | 0.232   |
| H-24 NLR              | 7.9 [5.1-14.1] | 4.6[2.9-7.5]  | 1.059 [1.035-1.084] | <0.001* | 1.006 [0.963-1.050]     | 0.798   |
| $\Delta$ NLR >0 (%)   | 271 (39.0)     | 58 (55.2)     | 1.931 [1.277-2.920] | 0.002*  | 2.142 [1.132-4.056]     | 0.019*  |

Data are all expressed in median [Q1–Q3] or n (%) where n is the total number of patients with available data. \*  $p < 0.05$ , \*\* model adjusted on Gender, Body mass index, C reactive protein, Creatinine, Admission NLR, NLR H24 and  $\Delta$  NLR.

Abbreviations: OR= odds ratio, BMI = body mass index, CRP=C reactive protein, NLR= neutrophil to lymphocyte ratio,  $\Delta$ NLR = difference between NLR (NLR H-24 - NLR at admission).

**Figure 3:** Receiver operating characteristics (ROC) curve for NLR as a predictive factor of mortality in COVID-19 patients

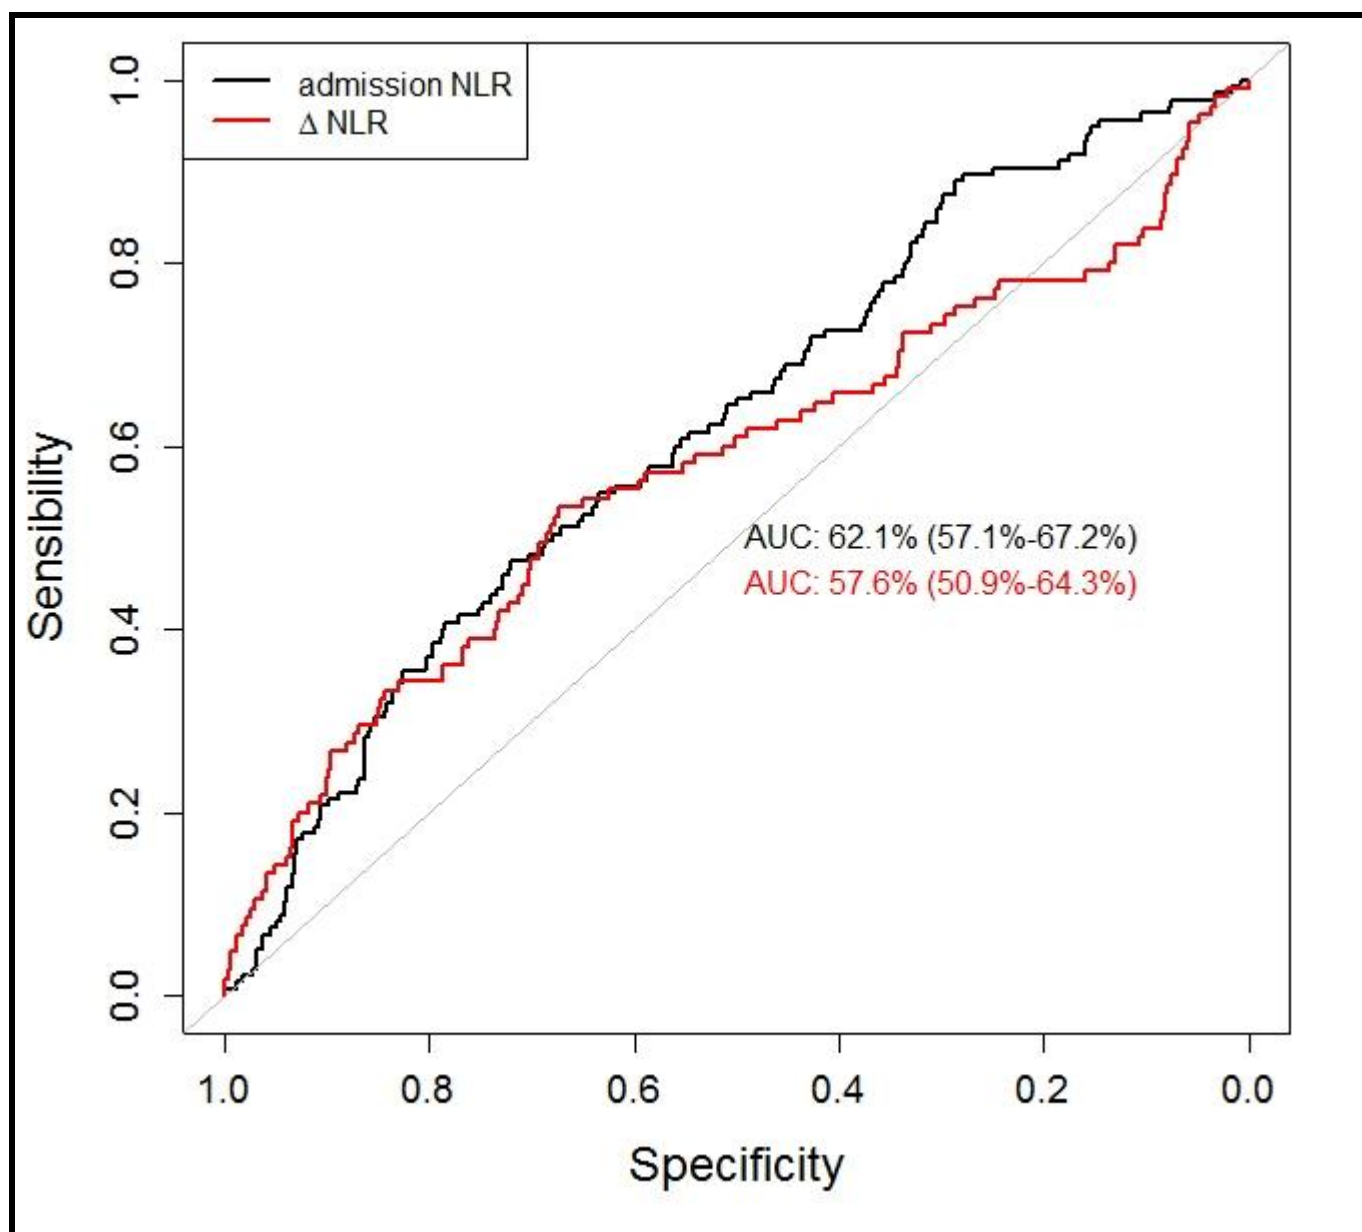

| To predict mortality | Area under curve    | Cut-off | Sensibility      | Specificity      | Multivariate analysis with cut-off** |        |
|----------------------|---------------------|---------|------------------|------------------|--------------------------------------|--------|
|                      |                     |         |                  |                  | OR (95%CI)                           | p      |
| Admission NLR        | 0,621 [0,571-0,672] | 8.236   | 47.4 [38,8-56,2] | 71.9 [68,8-74,9] | 1.025 (0.989-1.063)                  | 0.176  |
| ΔNLR                 | 0,576 [0,509-0,643] | 0.411   | 53.3 [43,3-63,1] | 67.3 [63,7-70,8] | 2.71 (1.404-5.245)                   | 0.003* |

Data are all expressed in median [Q1–Q3], \*  $p < 0.005$ , \*\*: model adjusted on Gender, Body mass index, C reactive protein, Creatinine, Admission NLR, NLR H24 and ΔNLR.

**Abbreviations:** OR= odds ratio, NLR= neutrophil lymphocyte ratio, ΔNLR = difference between NLR (NLR H-24 - NLR at admission).
